# Supplementary material for: Autophagy Limits Inflammasome During Chlamydia pneumoniae Infection
Source: PubMed Central journal article supplement (PMC6473188; doi:10.3389/fimmu.2019.00754), 2019-04-12
Supplement: Image_1.pdf [file Image_1.pdf]

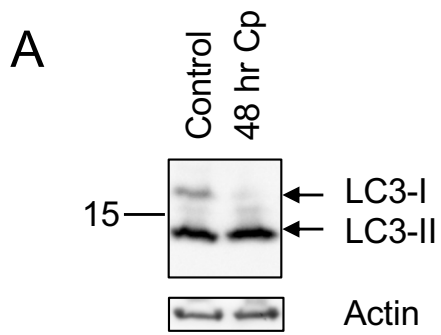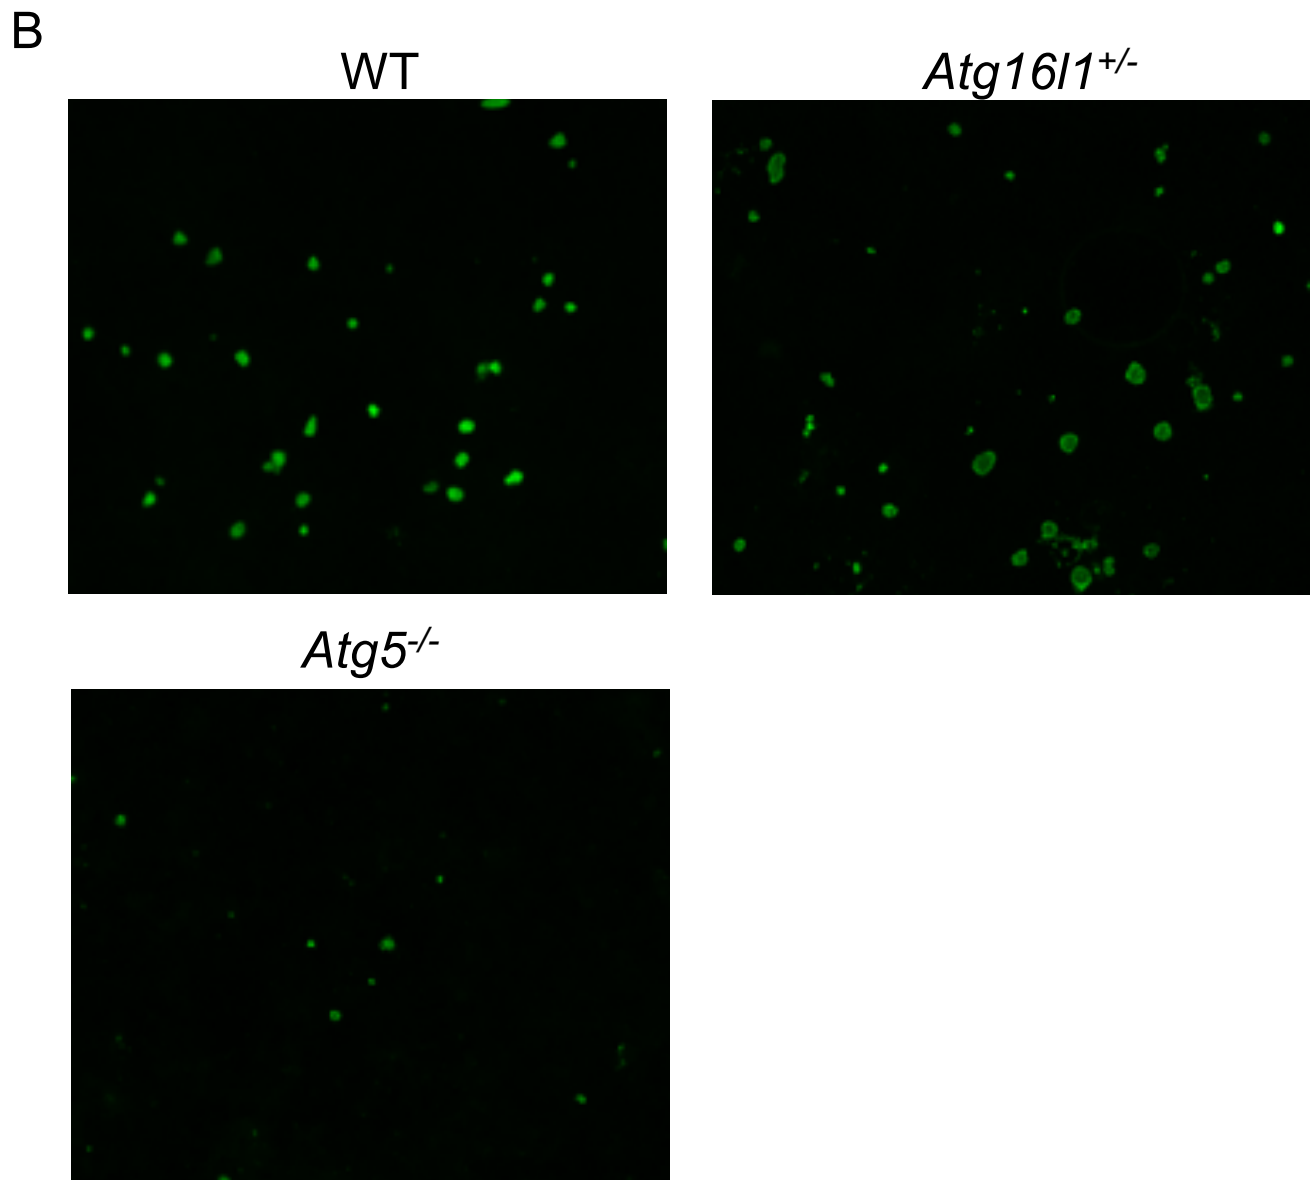

**Supplemental Figure 1. Autophagy plays a role during CP growth.** A) Western analysis of LC3 in WT MEFs during CP infection. B) Representative images of CP inclusions in WT, *Atg16l1*<sup>+/-</sup>, and *Atg5*<sup>-/-</sup> MEFs.

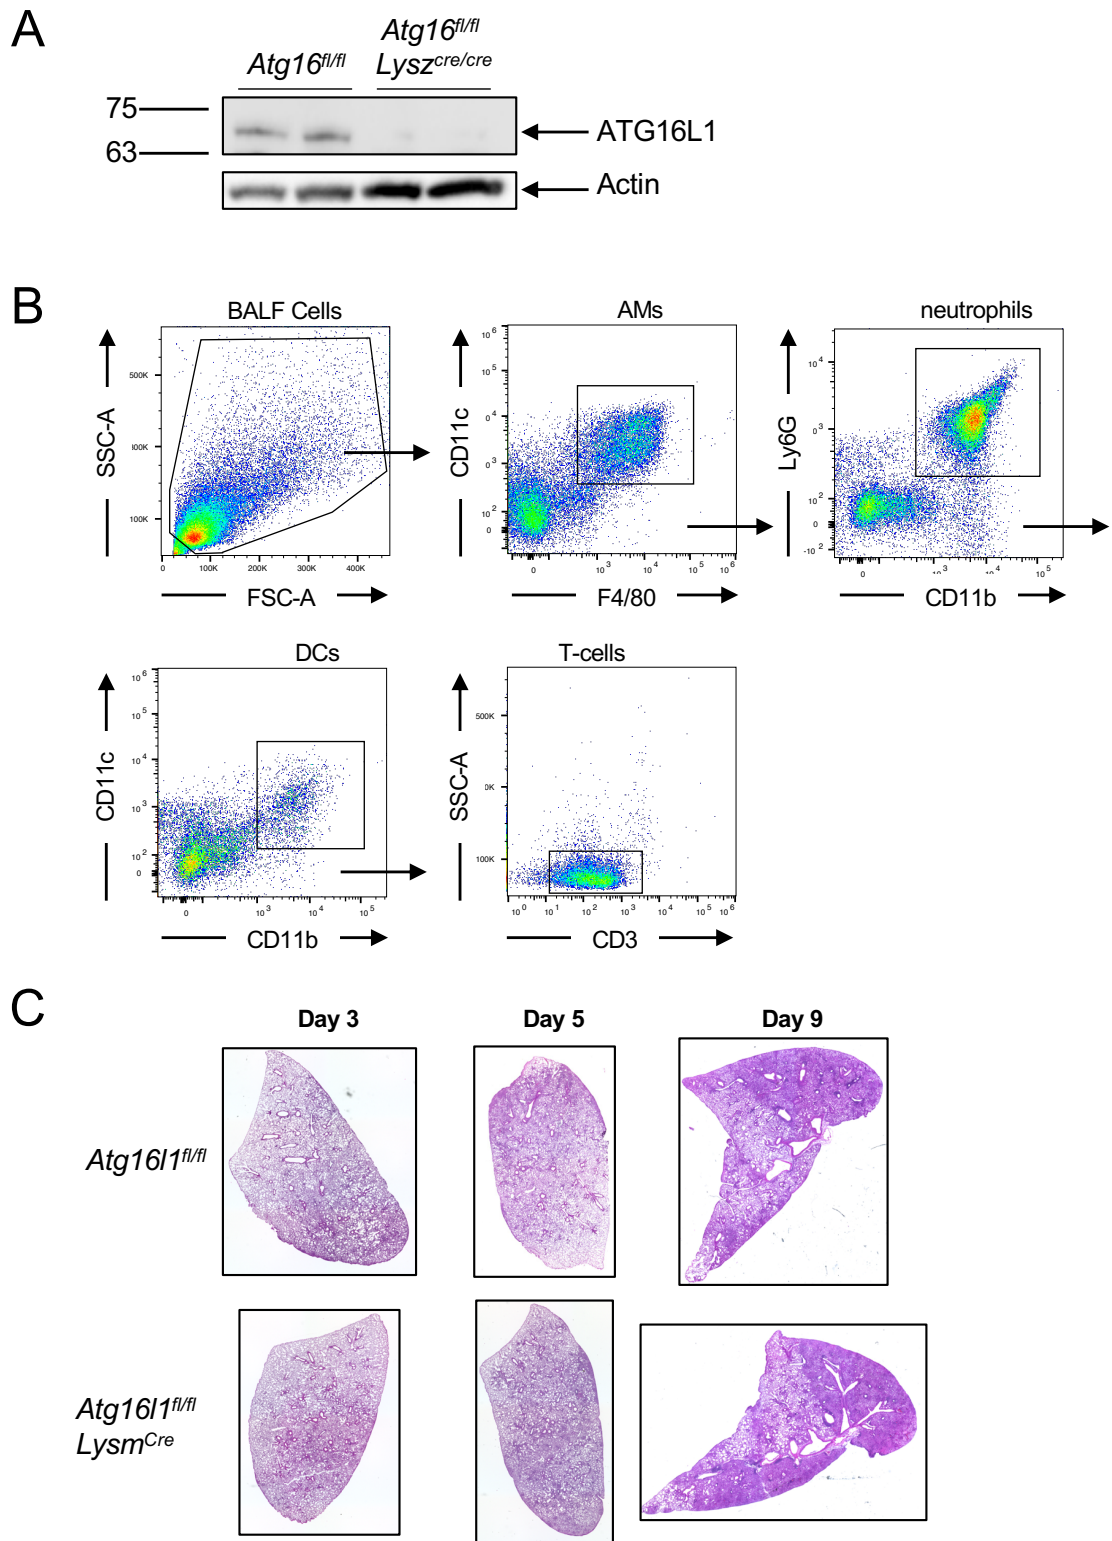

**Supplemental Figure 2.** A) ATG16L1 Western blot analysis of bone marrow derived macrophages. B) Gating strategy for flow cytometry analysis of BALF samples. Initial gate is positive. Subsequent gating is negative. C) *Atg16<sup>fl/fl</sup>* and *Atg16<sup>fl/fl</sup> Lysm<sup>Cre</sup>* mice were infected with  $1.0 \times 10^6$  IFU CP i.t. and mice were sacrificed 3, 5, and 9 days after infection. Representative Hematoxylin and Eosin stained lung sections.

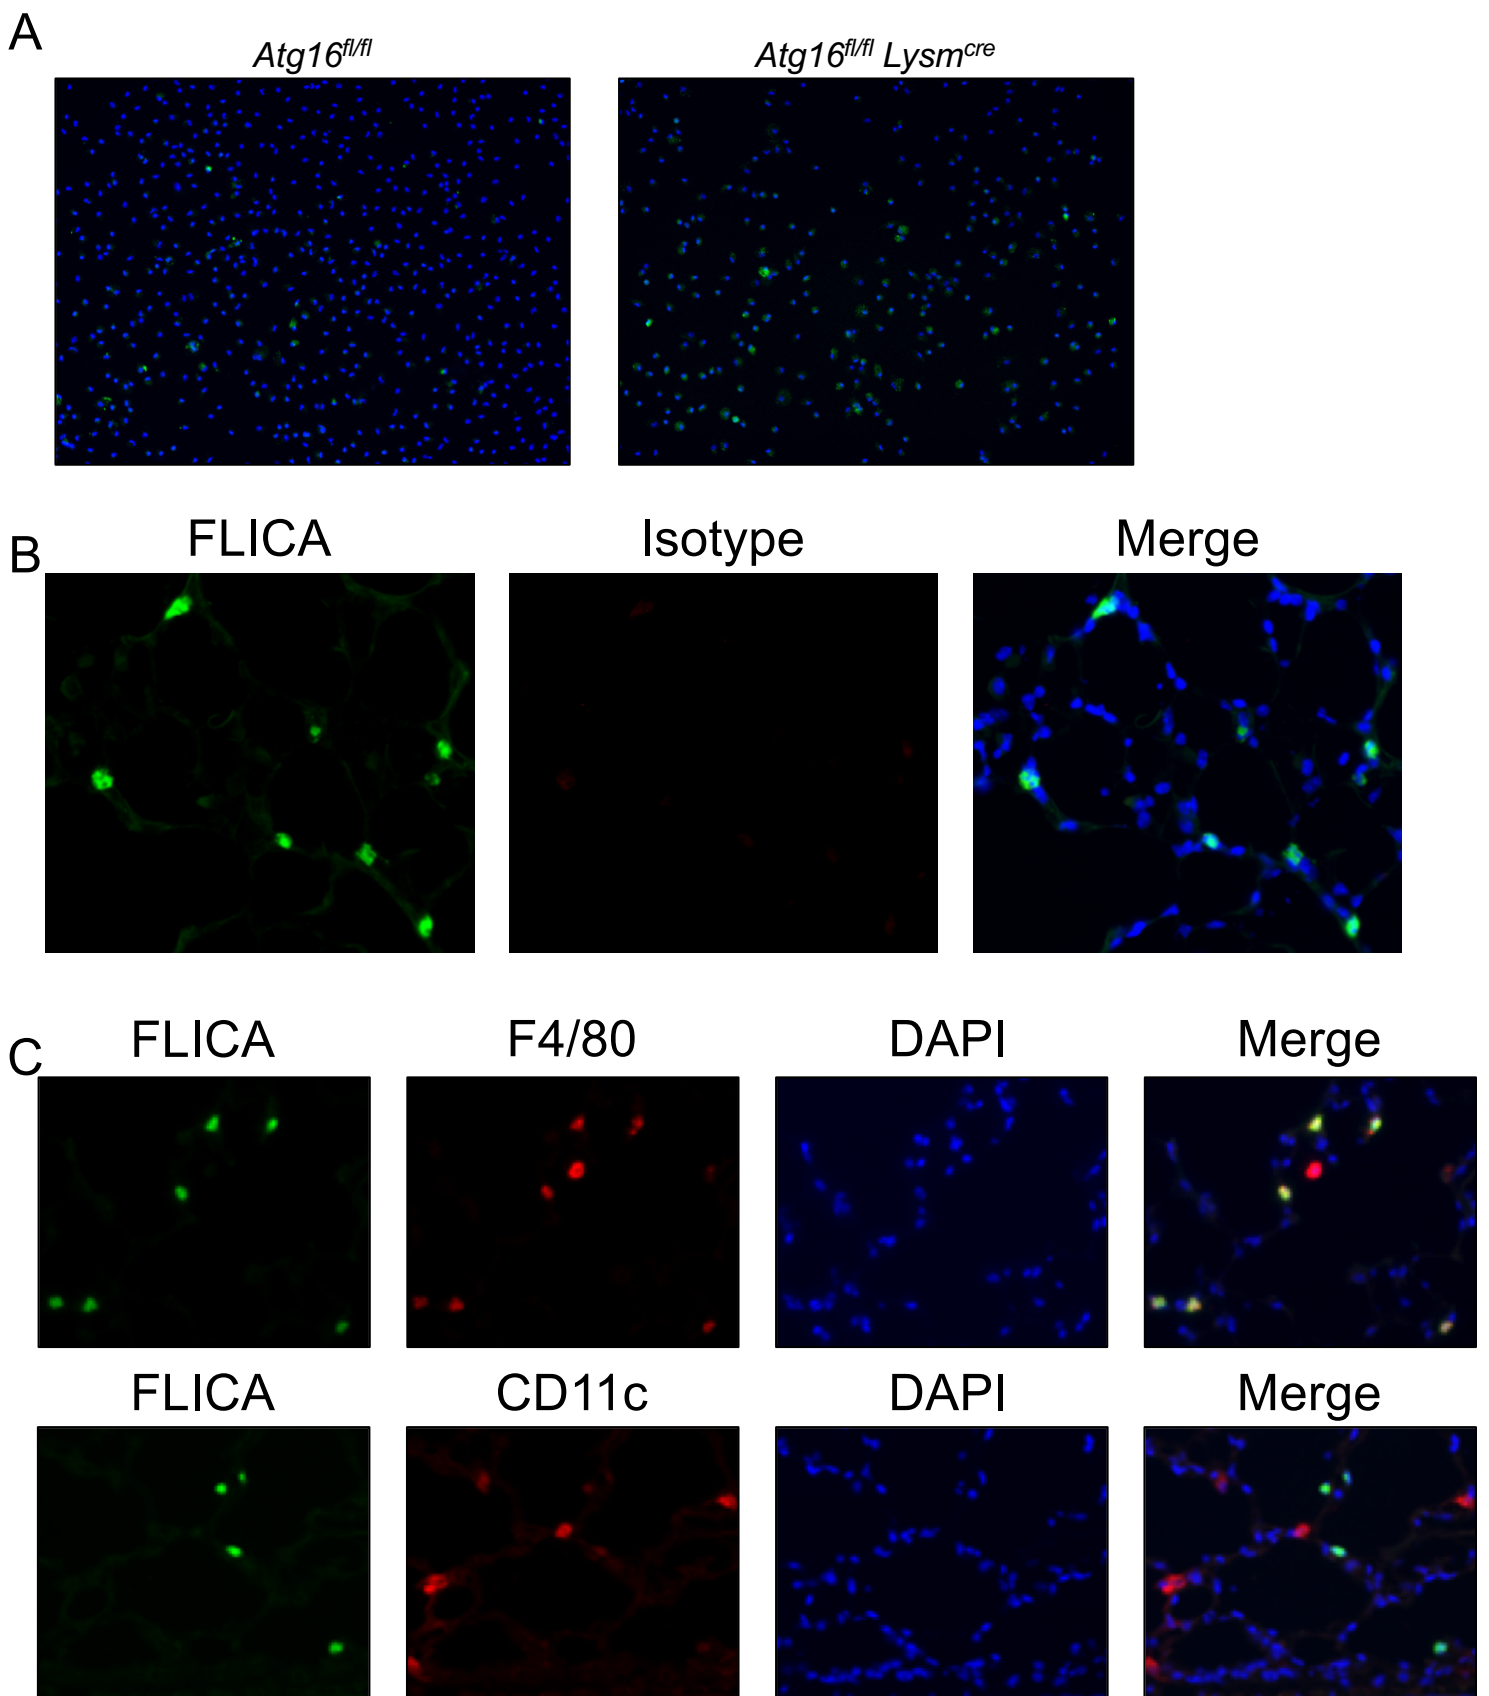

**Supplemental Figure 3. Loss of autophagy in myeloid cells leads to an increase in inflammasome active macrophages during CP infection.** A) Representative image of Caspase-1 activity measured by FLICA in peritoneal macrophages infected with CP (20 hr post infection). B) Isotype controls for anti-F4/80 and anti-CD11c staining. C) Caspase-1 activity measured by FLICA in frozen lung sections 1 day after CP infection. CD11c staining does not overlap with FLICA.

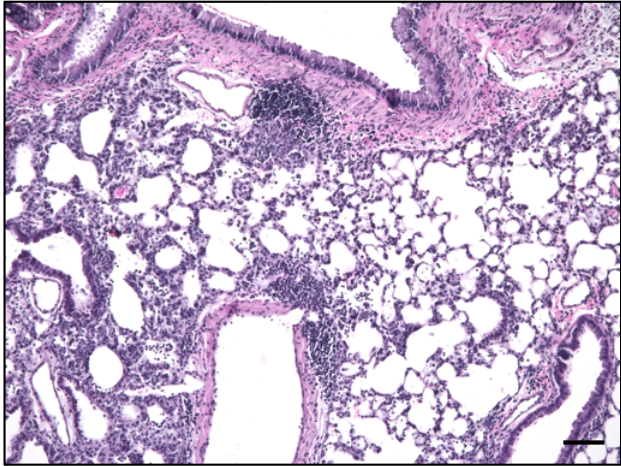

Control

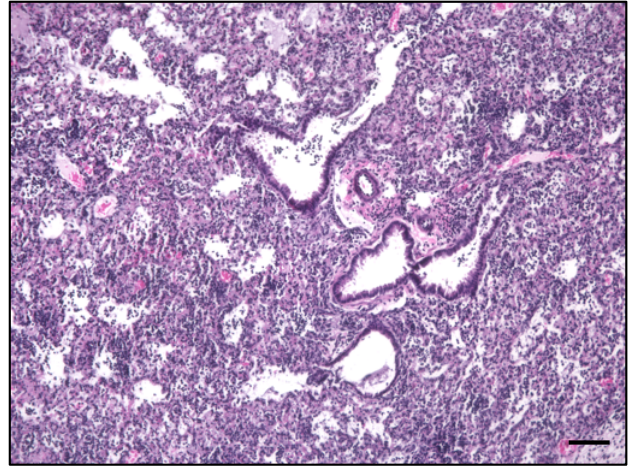

Rapamycin

**Supplemental Figure 4.** C57Bl/6 mice were infected with  $1 \times 10^6$  IFU CP. 6 hr prior to infection, mice received either vehicle or 3 mg/kg rapamycin i.p., and again every other day (n=8-12). Mice were sacrificed on day 6. Representative H&E is shown. Scale = 100  $\mu$ m.
